# Supplementary material
Source: publisher figshare collection journal article supplement (https://acs.figshare.com/ndownloader/files/4474210)
Supplement: Supplementary file 1 [file 4474210]

# Photoluminescent Properties of Chalcobromide-capped Octahedral Hexarhenium(III) Complexes

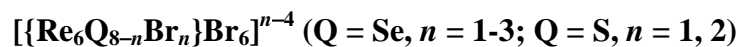

*Takashi Yoshimura,\* Ayumi Matsuda, Yuki Ito,<sup>†</sup> Shoji Ishizaka,<sup>†</sup> Satoshi Shinoda,<sup>‡</sup> Hiroshi Tsukube,<sup>‡</sup>*

*Noboru Kitamura,<sup>†</sup> and Atsushi Shinohara*

Department of Chemistry, Graduate School of Science, Osaka University, Toyonaka, 560-0043, Japan,

<sup>†</sup>Department of Chemistry, Graduate School of Science, Hokkaido University, Sapporo 060-0810, Japan,

<sup>‡</sup>Department of Chemistry, Graduate School of Science, Osaka City University, Osaka 558-8585, Japan.

## Supporting Information

### Figures S1-S11

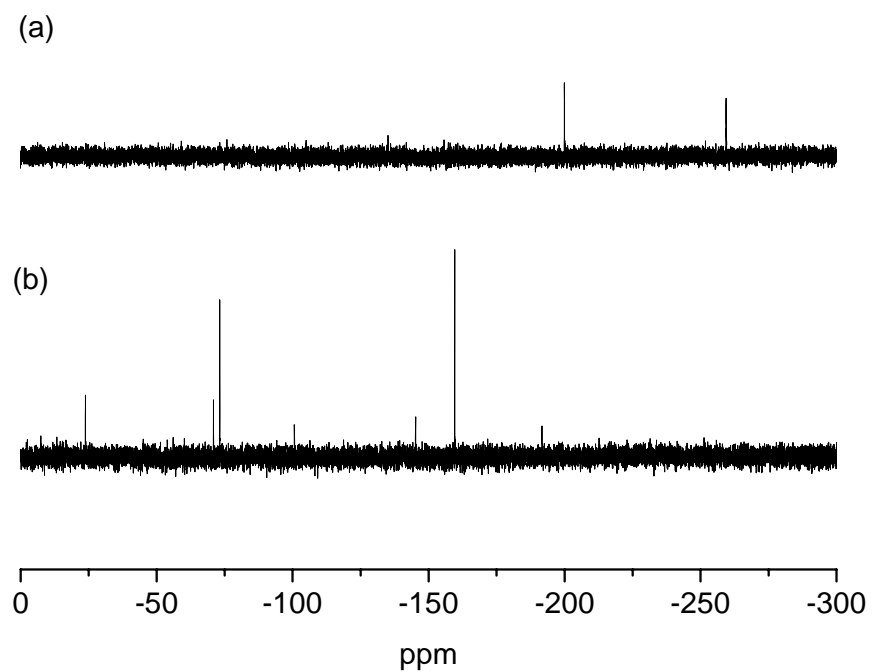

**Figure S1.** The  $^{77}\text{Se}$  NMR spectra for  $(\text{Bu}_4\text{N})_3[\{\text{Re}_6\text{Se}_7\text{Br}\}\text{Br}_6]$  (a) in  $\text{CD}_3\text{CN}$  and  $(\text{Bu}_4\text{N})[\{\text{Re}_6\text{Se}_5\text{Br}_3\}\text{Br}_6]$  (b) in  $\text{DMSO}-d_6$  at room temperature.

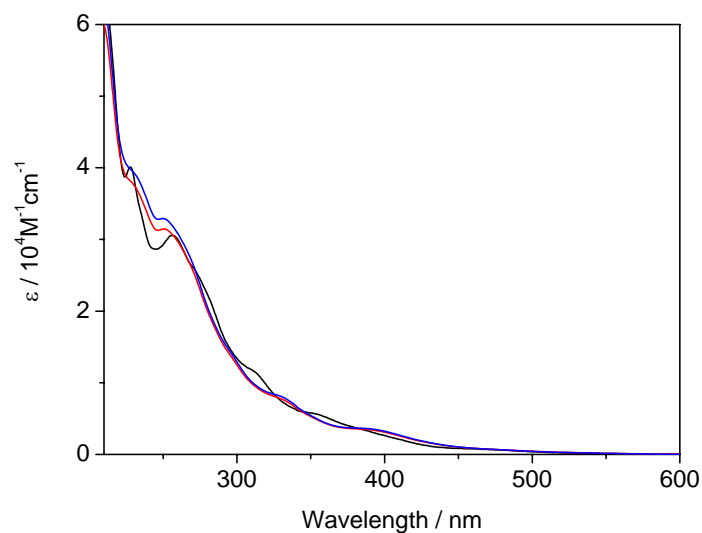

**Figure S2.** UV-vis absorption spectra of the  $D_{3d}$  ( $[2\mathbf{a}\text{-Se}]^{2-}$ , black) and  $C_{2v}$  ( $[2\mathbf{b}\text{-Se}]^{2-}$ , red;  $[2\mathbf{b}\text{-Se}]^{2-}$ , blue) isomers for  $(\text{Bu}_4\text{N})_2[\{\text{Re}_6\text{S}_6\text{Br}_2\}\text{Br}_6]$  in acetonitrile at room temperature.

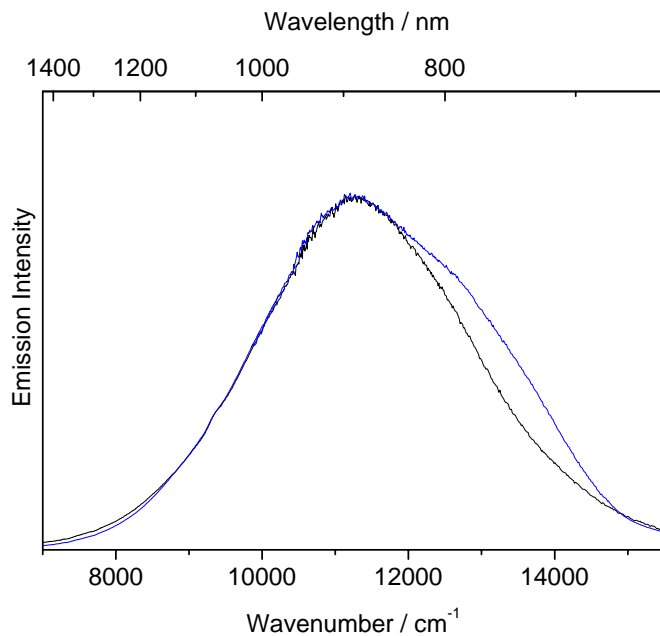

**Figure S3.** Emission spectra for  $(\text{Bu}_4\text{N})_3[\{\text{Re}_6\text{Q}_7\text{Br}\}\text{Br}_6]$  ( $\text{Q} = \text{S}$  (black),  $\text{Q} = \text{Se}$  (blue)) in the crystalline phase at 296 K.

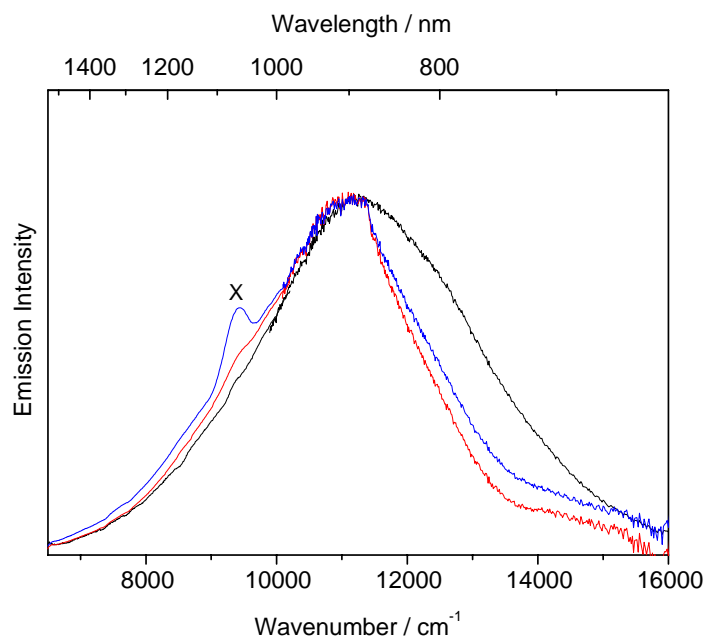

**Figure S4.** Emission spectra for  $(\text{Bu}_4\text{N})_2[\{\text{Re}_6\text{S}_6\text{Br}_2\}\text{Br}_6]$  ( $(\text{Bu}_4\text{N})_2[2\text{a-S}]$  (black),  $(\text{Bu}_4\text{N})_2[2\text{b-S}]$  (red), and  $(\text{Bu}_4\text{N})_2[2\text{c-S}]$  (blue)) in the crystalline phase at 296 K. The feature with x is due to instrumental artifact.

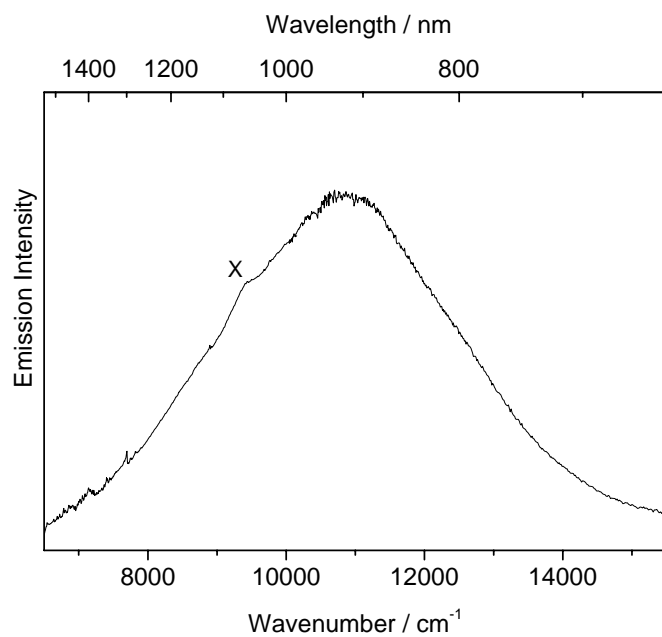

**Figure S5.** Emission spectrum for  $(\text{Bu}_4\text{N})[\{\text{Re}_6\text{Se}_5\text{Br}_3\}\text{Br}_6]$  ( $(\text{Bu}_4\text{N})[3\text{-Se}]$ ) in the crystalline phase at 296 K. The feature with x is due to instrumental artifact.

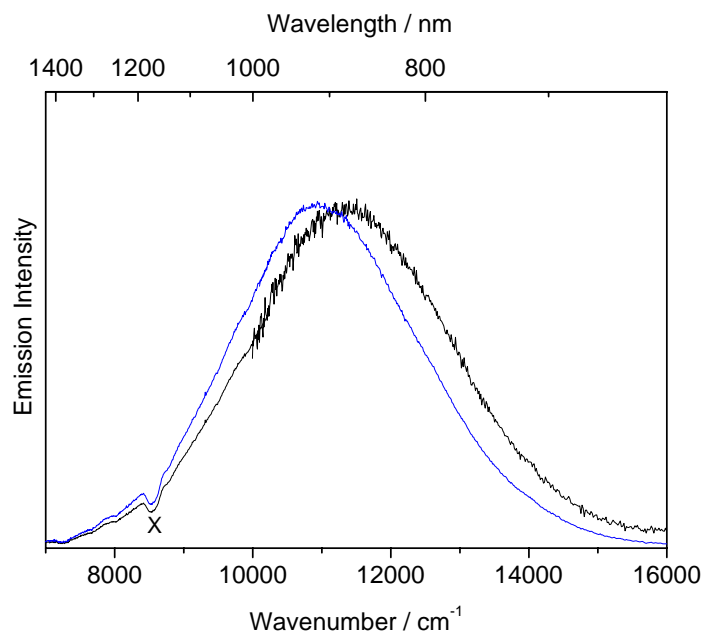

**Figure S6.** Emission spectra for  $(\text{Bu}_4\text{N})_3[\{\text{Re}_6\text{Q}_7\text{Br}\}\text{Br}_6]$  ( $\text{Q} = \text{S}$  (black),  $\text{Q} = \text{Se}$  (blue)) in acetonitrile at 296 K. The feature with x is due to instrumental artifact.

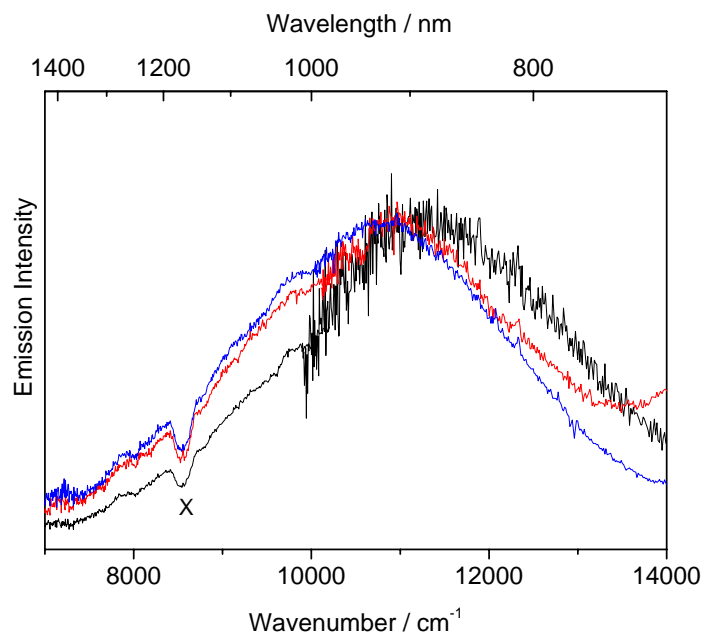

**Figure S7.** Emission spectra for  $(\text{Bu}_4\text{N})_2[\{\text{Re}_6\text{S}_6\text{Br}_2\}\text{Br}_6]$  ( $(\text{Bu}_4\text{N})_2[2\text{a-S}]$  (black),  $(\text{Bu}_4\text{N})_2[2\text{b-S}]$  (red), and  $(\text{Bu}_4\text{N})_2[2\text{c-S}]$  (blue)) in acetonitrile at 296 K. The feature with x is due to instrumental artifact.

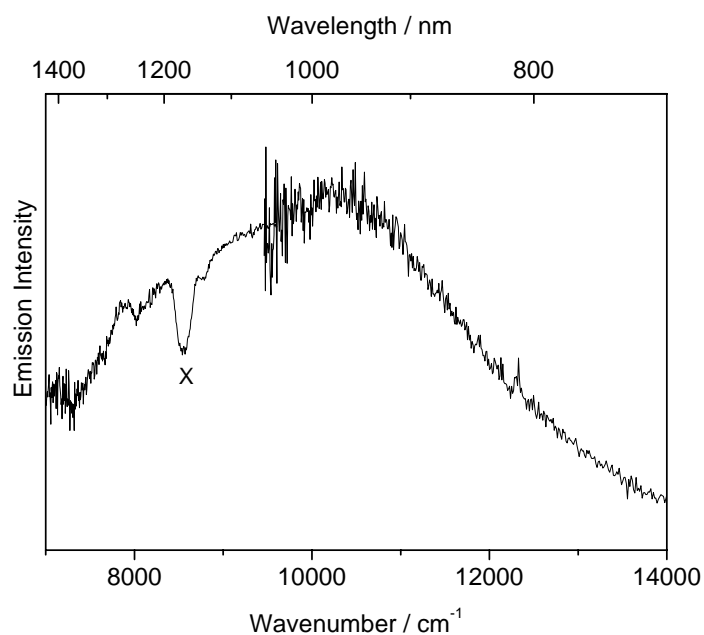

**Figure S8.** Emission spectrum for  $(\text{Bu}_4\text{N})[\{\text{Re}_6\text{Se}_5\text{Br}_3\}\text{Br}_6]$  ( $(\text{Bu}_4\text{N})[\mathbf{3-Se}]$ ) in acetonitrile at 296 K. The feature with x is due to instrumental artifact.

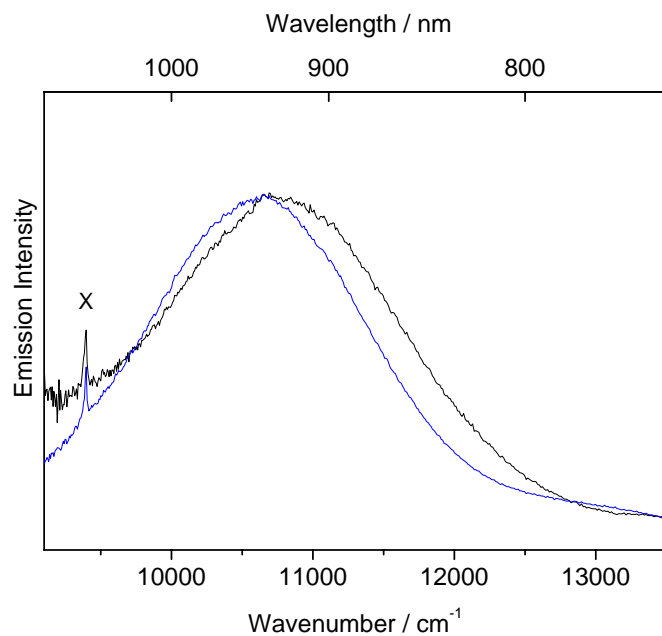

**Figure S9.** Emission Spectra for  $(\text{Bu}_4\text{N})_3[\{\text{Re}_6\text{Q}_7\text{Br}\}\text{Br}_6]$  ( $\text{Q} = \text{S}$  (black),  $\text{Q} = \text{Se}$  (blue)) in the crystalline phase at 80 K. The feature with x is due to instrumental artifact.

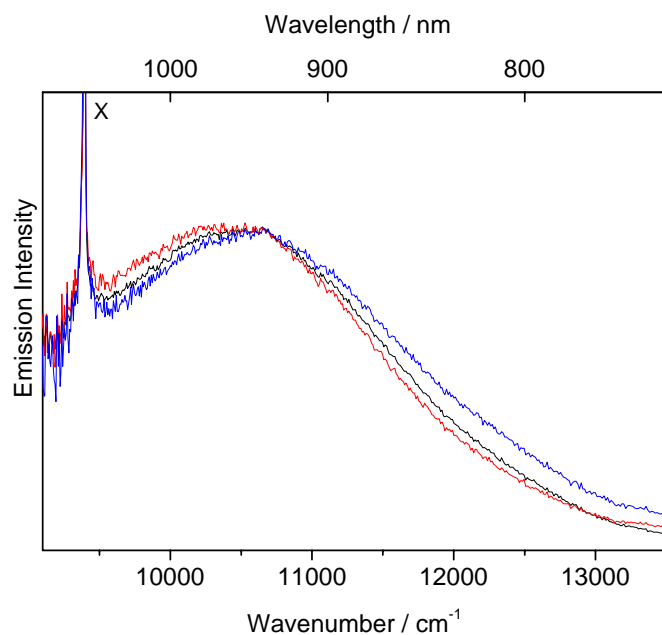

**Figure S10.** Emission Spectra for  $(\text{Bu}_4\text{N})_2[\{\text{Re}_6\text{S}_6\text{Br}_2\}\text{Br}_6]$  ( $(\text{Bu}_4\text{N})_2[\mathbf{2a-S}]$  (black),  $(\text{Bu}_4\text{N})_2[\mathbf{2b-S}]$  (red), and  $(\text{Bu}_4\text{N})_2[\mathbf{2c-S}]$  (blue)) in the crystalline phase at 80 K. The feature with x is due to instrumental artifact.

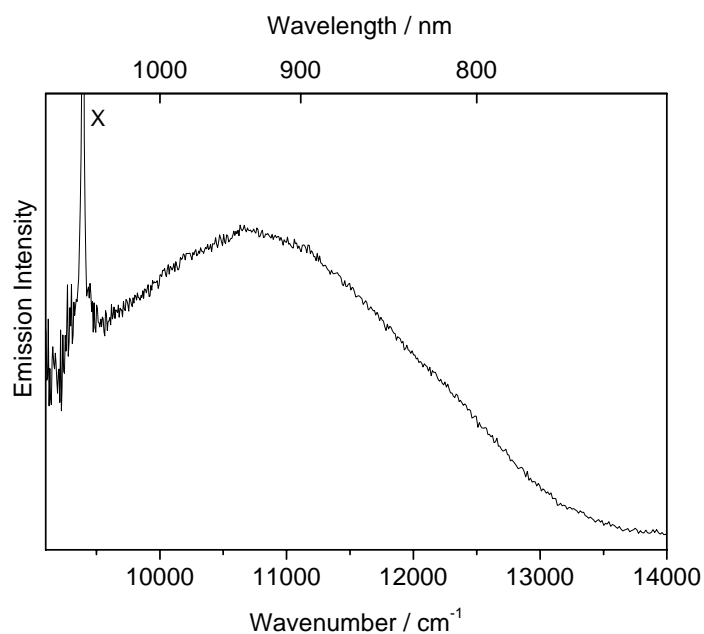

**Figure S11.** Emission Spectrum for  $(\text{Bu}_4\text{N})[\{\text{Re}_6\text{Se}_5\text{Br}_3\}\text{Br}_6]$  in the crystalline phase at 95 K. The feature with x is due to instrumental artifact.
